# Supplementary material for: How to Achieve an Optimal Balance in the “Impossible Triangle” of Live-Streaming E-commerce? — A Study on the LS-F Suppliers' Quality Investment Strategies Under the Evolution of Decision-Making Authority Regarding Pricing and Commissions
Source: Research Square preprint supplement (doi:10.21203/rs.3.rs-8518586/v1), 2026-02-13
Supplement: Supplementary file 1 [file 058c73c24cb9fba5df56b360.docx]

## How to Achieve an Optimal Balance in the “Impossible Triangle” of Live-Streaming E-commerce? — A Study on the LS-F Suppliers' Quality Investment Strategies Under the Evolution of Decision-Making Authority Regarding Pricing and Commissions

**Yuexiang Yang &1 · Zhenwu Chen🖂&1 · Ketao Huang1 ·Xinyi Li2**

**Abstract:** This study constructs a theoretical analysis framework of the "impossible trinity" in live streaming e-commerce. From the two dimensions of "price" and "commission", it analyzes how changes in decision-making power affect the dimension of "quality", and accordingly establishes a differential game model of the dual-quality decision-making between "streamers and LS-F Suppliers". Specifically, it explores how changes in price decision-making power and commission decision-making power influence the LS-F Suppliers' product quality investment efforts and the dynamic trajectory of live streaming product quality. The research findings are as follows: (1) When the LS-F Suppliers gradually gain the power of price decision-making and commission decision-making, their quality investment efforts remain at a high level. (2) When the streamer's commission rate is low, if the initial live streaming price is high or low, the quality trajectory of live streaming products and the LS-F Supplier's profit trajectory show a positive synchronous growth. If the initial live streaming price is moderate, both trajectories show a negative synchronous growth. When the streamer's commission rate is high, if the initial live streaming price is high or low, the product quality trajectory shows positive growth while the LS-F Supplier's profit trajectory shows negative growth. If the initial live streaming price is moderate, the LS-F Supplier's profit trajectory shows positive growth while the product quality trajectory shows negative growth. (3) The fluctuation of the live streaming product quality trajectory is always relatively stable when the streamer solely decides the price. When the initial live streaming traffic is high, the quality trajectory fluctuates sharply during bargaining scenario; when the initial live streaming traffic is low, the quality trajectory fluctuates sharply when the LS-F Supplier solely decides the price.

**Keywords:** Impossible Trinity in Live Streaming E-commerce; Product Quality Investment Efforts; Price and Commission

| Communicated by Zhenwu Chen. 🖂 chenzhenwu97@163.com  &: Yuexiang Yang and Zhenwu Chen are co-first authors of the article |
| --- |

1 School of Management, China University of Mining and Technology (Beijing), Beijing, P. R. China

2 School of Economics and Management, University of Chinese Academy of Sciences, Beijing, P. R. China

**Data availability**

No data was used for the research described in the article.

**CRediT authorship contribution statement**

Yuexiang Yang: Conceptualization, Methodology, Supervision; **Email:** 201901@cumtb.edu.cn

Zhenwu Chen: Writing – original draft, Writing – review & editing; **Email:** [chenzhenwu97@163.com](mailto:chenzhenwu97@163.com)

Ketao Huang: Validation; **Email:** hkthmq8799@163.com

Xinyi Li: Investigation; **Email:** 15838208632@163.com

**Declaration of Competing Interest**

The authors declare that they have no known competing financial interests or personal relationships that could have appeared to influence the work reported in this paper.

**Funding statement**

This work was supported by (The National Key Research and Development Program of China [grantnumbers: 2024YFF0618703-3], The National Natural Science Foundation of China [grantnumbers: 72362015, 72462018], The Ministry of Education of Humanities and Social Science project of the People’s Republic of China [grant numbers: 22YJAZH159] and The Social Science Foundation of Jiangxi Province of China[grant numbers: No.24GL16])

**Declaration of Competing Interest**

The authors declare that they have no known competing financial interests or personal relationships that could have appeared to influence the work reported in this paper.

**Data availability**

No data was used for the research described in the article.

**Ethical statements**

This article does not contain any studies with human participants performed by any of the authors.

**Informed consent**

The informed consent was irrelevant as the research did not include any human participants.
