# Supplementary material for: How to Achieve an Optimal Balance in the “Impossible Triangle” of Live-Streaming E-commerce? — A Study on the LS-F Suppliers' Quality Investment Strategies Under the Evolution of Decision-Making Authority Regarding Pricing and Commissions
Source: Research Square preprint supplement (doi:10.21203/rs.3.rs-8518586/v1), 2026-02-13
Supplement: Supplementary file 2 [file 227131ec04eb7b11c84cc481.docx]

## Declaration of Competing Interest

The authors declare that they have no known competing financial interests or personal relationships that could have appeared to influence the work reported in this paper.
